# Supplementary material for: Structural and functional insights into the periplasmic detector domain of the GacS histidine kinase controlling biofilm formation in Pseudomonas aeruginosa
Source: PubMed Central journal article supplement (PMC5595915; doi:10.1038/s41598-017-11361-3), 2017-09-12
Supplement: 41598_2017_11361_MOESM1_ESM.pdf [file 41598_2017_11361_MOESM1_ESM.pdf]

**Structural and functional insights into the periplasmic detector domain of the GacS histidine kinase controlling biofilm formation in *Pseudomonas aeruginosa***

**Ahmad Ali-Ahmad<sup>1\*</sup>, Firas Fadel, Corinne Sebban-Kreuzer, Moly Ba, Gauthier Dangla Pélissier, Olivier Bornet, Françoise Guerlesquin, Yves Bourne, Christophe Bordi, Florence Vincent**

**Table S1: Strains used in this study**

| Strains                                                       | Relevant characteristics                                                                                                                                                                                                                         | Source         |
|---------------------------------------------------------------|--------------------------------------------------------------------------------------------------------------------------------------------------------------------------------------------------------------------------------------------------|----------------|
| <i>E. coli</i>                                                |                                                                                                                                                                                                                                                  |                |
| DH5 $\alpha$                                                  | <i>endA1 hsdR17 supE44 thi-1 recA1 gyrA relA1 <math>\Delta</math>(lacZYA-argF)U169 deoR (phi 80lacZ <math>\Delta</math> M15)</i>                                                                                                                 | Lab collection |
| CC118( $\lambda$ pir)                                         | Host strain for pKNG101 replication, $\Delta$ ( <i>ara-leu</i> ) <i>araD <math>\Delta</math>lacX74 galE galK phoA20 thi-1 rpsE rpoB argE(Am) recA1 Rf<sup>R</sup> (<math>\lambda</math>pir)</i>                                                  | Lab collection |
| BL21 DE3                                                      | <i>fhuA2 [lon] ompT gal (<math>\lambda</math> DE3) [dcm] <math>\Delta</math>hsdS <math>\lambda</math> DE3 = <math>\lambda</math> sBamHIo <math>\Delta</math>EcoRI-B int::(<i>lacI::PlacUV5::T7 gene1</i>) <i>i21 <math>\Delta</math>nin5</i></i> | Lab collection |
| <i>P. aeruginosa</i>                                          |                                                                                                                                                                                                                                                  |                |
| PAK                                                           | Wild type                                                                                                                                                                                                                                        | 63             |
| PAK $\Delta$ <i>gacS</i>                                      | PAK deletion mutant for <i>gacS</i> gene                                                                                                                                                                                                         | 31             |
| PAK <i>gacS</i> $\Delta$ <sub>PD</sub>                        | PAK deletion mutant for the periplasmic domain of <i>gacS</i> gene                                                                                                                                                                               | This study     |
| PAK <i>gacS</i> <sub>R94A</sub>                               | Point chromosomal mutant R94A of <i>gacS</i> gene in PAK                                                                                                                                                                                         | This study     |
| PAK <i>gacS</i> <sub>H97A</sub>                               | Point chromosomal mutant H97A of <i>gacS</i> gene in PAK                                                                                                                                                                                         | This study     |
| PAK <i>gacS</i> <sub>D110A</sub>                              | Point chromosomal mutant D110A of <i>gacS</i> gene in PAK                                                                                                                                                                                        | This study     |
| PAK <i>gacS</i> <sub>H124A</sub>                              | Point chromosomal mutant H124A of <i>gacS</i> gene in PAK                                                                                                                                                                                        | This study     |
| PAK <i>gacS</i> <sub>H133A</sub>                              | Point chromosomal mutant H133A of <i>gacS</i> gene in PAK                                                                                                                                                                                        | This study     |
| PAK <i>gacS</i> <sub>W150A</sub>                              | Point chromosomal mutant W150A of <i>gacS</i> gene in PAK                                                                                                                                                                                        | This study     |
| PAK $\Delta$ RetS                                             | PAK deletion mutant for <i>retS</i> gene                                                                                                                                                                                                         | 14             |
| PAK <i>attB::rsmY-lacZ</i>                                    | PAK strain with <i>rsmY-lacZ</i> inserted at <i>attB</i> sites                                                                                                                                                                                   | 17             |
| PAK <i>attB::rsmZ-lacZ</i>                                    | PAK strain with <i>rsmZ-lacZ</i> inserted at <i>attB</i> sites                                                                                                                                                                                   | 17             |
| PAK $\Delta$ <i>gacSattB::rsmY-lacZ</i>                       | PAK $\Delta$ <i>gacS</i> strain with <i>rsmY-lacZ</i> inserted at <i>attB</i> sites                                                                                                                                                              | 17             |
| PAK $\Delta$ <i>gacSattB::rsmZ-lacZ</i>                       | PAK $\Delta$ <i>gacS</i> strain with <i>rsmZ-lacZ</i> inserted at <i>attB</i> sites                                                                                                                                                              | 17             |
| PAK $\Delta$ <i>gacS</i> <sub>PD</sub> <i>attB::rsmY-lacZ</i> | PAK $\Delta$ <i>gacS</i> <sub>PD</sub> strain with <i>rsmY-lacZ</i> inserted at <i>attB</i> sites                                                                                                                                                | This study     |
| PAK $\Delta$ <i>gacS</i> <sub>PD</sub> <i>attB::rsmZ-lacZ</i> | PAK $\Delta$ <i>gacS</i> <sub>PD</sub> strain with <i>rsmZ-lacZ</i> inserted at <i>attB</i> sites                                                                                                                                                | This study     |
| PAK <i>gacS</i> <sub>R94A</sub> <i>attB::rsmY-lacZ</i>        | PAK <i>gacS</i> <sub>R94A</sub> strain with <i>rsmY-lacZ</i> inserted at <i>attB</i> sites                                                                                                                                                       | This study     |
| PAK <i>gacS</i> <sub>R94A</sub> <i>attB::rsmZ-lacZ</i>        | PAK <i>gacS</i> <sub>R94A</sub> strain with <i>rsmZ-lacZ</i> inserted at <i>attB</i> sites                                                                                                                                                       | This study     |
| PAK <i>gacS</i> <sub>H97A</sub> <i>attB::rsmY-lacZ</i>        | PAK <i>gacS</i> <sub>H97A</sub> strain with <i>rsmY-lacZ</i> inserted at <i>attB</i> sites                                                                                                                                                       | This study     |
| PAK <i>gacS</i> <sub>H97A</sub> <i>attB::rsmZ-lacZ</i>        | PAK <i>gacS</i> <sub>H97A</sub> strain with <i>rsmZ-lacZ</i> inserted at <i>attB</i> sites                                                                                                                                                       | This study     |
| PAK <i>gacS</i> <sub>D110A</sub> <i>attB::rsmY-lacZ</i>       | PAK <i>gacS</i> <sub>D110A</sub> strain with <i>rsmY-lacZ</i> inserted at <i>attB</i> sites                                                                                                                                                      | This study     |
| PAK <i>gacS</i> <sub>D110A</sub> <i>attB::rsmZ-lacZ</i>       | PAK <i>gacS</i> <sub>D110A</sub> strain with <i>rsmZ-lacZ</i> inserted at <i>attB</i> sites                                                                                                                                                      | This study     |
| PAK <i>gacS</i> <sub>H124A</sub> <i>attB::rsmY-lacZ</i>       | PAK <i>gacS</i> <sub>H124A</sub> strain with <i>rsmY-lacZ</i> inserted at <i>attB</i> sites                                                                                                                                                      | This study     |
| PAK <i>gacS</i> <sub>H124A</sub> <i>attB::rsmZ-lacZ</i>       | PAK <i>gacS</i> <sub>H124A</sub> strain with <i>rsmZ-lacZ</i> inserted at <i>attB</i> sites                                                                                                                                                      | This study     |
| PAK <i>gacS</i> <sub>H133A</sub> <i>attB::rsmY-lacZ</i>       | PAK <i>gacS</i> <sub>H133A</sub> strain with <i>rsmY-lacZ</i> inserted at <i>attB</i> sites                                                                                                                                                      | This study     |
| PAK <i>gacS</i> <sub>H133A</sub> <i>attB::rsmZ-lacZ</i>       | PAK <i>gacS</i> <sub>H133A</sub> strain with <i>rsmZ-lacZ</i> inserted at <i>attB</i> sites                                                                                                                                                      | This study     |
| PAK <i>gacS</i> <sub>W150A</sub> <i>attB::rsmY-lacZ</i>       | PAK <i>gacS</i> <sub>W150A</sub> strain with <i>rsmY-lacZ</i> inserted at <i>attB</i> sites                                                                                                                                                      | This study     |

**Table S2: NMR and refinement statistics of the GacSp structure.** Structural statistics and restraint violations of the 20 selected structures representative of GacSp in solution at 298K.

| <b>Restraints used for the calculation</b>    |           |
|-----------------------------------------------|-----------|
| NMR distance and dihedral restraints          |           |
| Effective distance restraints                 | 1299      |
| Short-range $\leq( i-j 1)$                    | 613       |
| Medium-range $\ll(1 i-j 5)$                   | 278       |
| Long-range, $ i-j \geq 5$                     | 408       |
| Average number of restraints per residue      | 9.48      |
| Dihedrals                                     | 94        |
| Hydrogen bonds                                | 27        |
| Structure statistics                          |           |
| Distance restraint violation $>0.5\text{\AA}$ | 0         |
| CNS potential energy (kcal/mol)               |           |
| $E_{\text{total}}$                            | -4077.645 |
| $E_{\text{bond}}$                             | 89.358    |
| $E_{\text{angle}}$                            | 485.937   |
| $E_{\text{dihedral}}$                         | 1398.193  |
| $E_{\text{vdw}}$                              | -1046.495 |
| $E_{\text{electric}}$                         | -8029.448 |
| Average ensemble RMSD $\text{\AA}$            |           |
| Backbone (residues 38-164)                    | 0.95      |
| Heavy atoms (residues 38-164)                 | 1.44      |
| Ramachandran plot %*                          |           |
| Most favorable region                         | 68.1      |
| Additional allowed region                     | 27.4      |
| Generous allowed region                       | 3.5       |
| Disallowed region                             | 0.9       |
| PDB ID: 5O7J                                  |           |

\* Calculated using PROCHECK program implanted in PDBsum server

**Table S3: Plasmids used in this study**

| Plasmids                                   | Relevant characteristics*                                                                                                                                            | Source                   |
|--------------------------------------------|----------------------------------------------------------------------------------------------------------------------------------------------------------------------|--------------------------|
| pLic03                                     | Vector containing T7 promoter with pBR322 origin of replication, Km <sup>R</sup>                                                                                     | 64                       |
| pLic03_GacSsp<br>PCR2.1                    | pLic03 carrying the Nt-6his tagged GacSsp subdomain DNA region<br>TA cloning vector for PCR products, LacZ $\alpha$ ColE1 fl ori, Ap <sup>R</sup> , Kam <sup>R</sup> | This study<br>Invitrogen |
| PKNG101                                    | Suicide vector in <i>P. aeruginosa</i> ; SacB, Sm <sup>R</sup>                                                                                                       | 65                       |
| pKRK2013                                   | Tra <sup>+</sup> Mob <sup>+</sup> Km <sup>+</sup>                                                                                                                    | Lab collection           |
| pKNG101 $\Delta$ <i>gacS</i> <sub>PD</sub> | Mutator plasmid for GacS periplasmic domain deletion in <i>gacS</i> gene, Sm <sup>R</sup>                                                                            | This study               |
| pKNG101 <i>gacS</i> <sub>R94A</sub>        | Mutator plasmid for point mutation R94A in <i>gacS</i> gene, Sm <sup>R</sup>                                                                                         | This study               |
| pKNG101 <i>gacS</i> <sub>H97A</sub>        | Mutator plasmid for point mutation R97A in <i>gacS</i> gene, Sm <sup>R</sup>                                                                                         | This study               |
| pKNG101 <i>gacS</i> <sub>D110A</sub>       | Mutator plasmid for point mutation D110A in <i>gacS</i> gene, Sm <sup>R</sup>                                                                                        | This study               |
| pKNG101 <i>gacS</i> <sub>H124A</sub>       | Mutator plasmid for point mutation H124A in <i>gacS</i> gene, Sm <sup>R</sup>                                                                                        | This study               |
| pKNG101 <i>gacS</i> <sub>H133A</sub>       | Mutator plasmid for point mutation H133A in <i>gacS</i> gene, Sm <sup>R</sup>                                                                                        | This study               |
| pKNG101 <i>gacS</i> <sub>W150A</sub>       | Mutator plasmid for point mutation W150A in <i>gacS</i> gene, Sm <sup>R</sup>                                                                                        | This study               |
| miniCTX-lacZ                               | TC lacZ <sup>+</sup> ; self-proficient integration vector with tet, V-FRT-attPMCS, ori, int, and oriT                                                                | 66                       |
| miniCTX- <i>rsmY</i> -lacZ                 | Promoter region of <i>rsmY</i> gene inserted into miniCTX-lacZ, Tc <sup>R</sup>                                                                                      | 17                       |
| miniCTX- <i>rsmZ</i> -lacZ                 | Promoter region of <i>rsmZ</i> gene inserted into miniCTX-lacZ, Tc <sup>R</sup>                                                                                      | 17                       |

\*Ap<sup>R</sup> ampicillin resistance, Sm<sup>R</sup> streptomycin resistance, TC<sup>R</sup> tetracyclin resistance, Km<sup>R</sup> Kanamycin

**Table S4: Oligonucleotides used in this study**

| Names                       | Oligonucleotides (5'→3')                   |
|-----------------------------|--------------------------------------------|
| Proteins production         |                                            |
| UpGacS <sub>PD</sub>        | TACTTCCAATCAATGATGCGCGCCCAGTTGATCGAG       |
| DnGacS <sub>PD</sub>        | TATCCACCTTTACTGTTATTATATCCGCGCAGCAGAGTCCCG |
| Point chromosomal mutations |                                            |
| UpUGacS <sub>R94A</sub>     | CTACTTATGGTACCCGGGCGTCGCAAGCCGAATCCGCC     |
| UpDGacS <sub>R94A</sub>     | CATGGGCGAGGGCTTCTGGCGG                     |
| DnUGacS <sub>R94A</sub>     | CCGCCAGGAAGCCCTCGCCCATG                    |
| DnDGacS <sub>R94A</sub>     | CCTGCAGGTCGACGGATCGCCAGAGGCCAGTTCGTCCA     |
| UpUGacS <sub>H97A</sub>     | CTACTTATGGTACCCGGGCGTCGCAAGCCGAATCCGCC     |
| UpDGacS <sub>H97A</sub>     | GCTTGGCCCCGGCGCGGGCGAGGCGTTCC              |
| DnUGacS <sub>H97A</sub>     | GGAACGCCTCGCCCCGCGCGGGCCAAGC               |
| DnDGacS <sub>H97A</sub>     | CCTGCAGGTCGACGGATCGCCAGAGGCCAGTTCGTCCA     |
| UpUGacS <sub>D110A</sub>    | CTACTTATGGTACCCGGGGATTGATTAGCAATCGTG       |
| UpDGacS <sub>D110A</sub>    | CATGCTCAAATGGCTGGCCGCGCCGGCCGGGGCGACGG     |
| DnUGacS <sub>D110A</sub>    | CCGTCGCCCCGGCCGGCGCGGCCAGCCATTTGAGCATG     |
| DnDGacS <sub>D110A</sub>    | CCTGCAGGTCGACGGATCGCCTCCTTGC GCGCCAGG      |
| UpUGacS <sub>H124A</sub>    | CTACTTATGGTACCCGGGCGTCGCAAGCCGAATCCGCC     |
| UpDGacS <sub>H124A</sub>    | AAGAACCGGTAGCAGGAACGCGCGTGGTGTCCAGTTCGGTG  |
| DnUGacS <sub>H124A</sub>    | CACCGAACTGGACACCACGGCGTTCCTGTACTACCGTTCTT  |
| DnDGacS <sub>H124A</sub>    | CCTGCAGGTCGACGGATCATGTTGGCGAGGAACCTCGGACT  |
| UpUGacS <sub>H133A</sub>    | CTACTTATGGTACCCGGGCGTCGCAAGCCGAATCCGCC     |
| UpDGacS <sub>H133A</sub>    | GTGGCGCCGGACAGGCTGTGCGCGCGCCAAGAACCGGTA    |
| DnUGacS <sub>H133A</sub>    | TACCGGTTCTTGGCCGCGCGCACAGCCTGTCCGGCGCCAC   |
| DnDGacS <sub>H133A</sub>    | CCTGCAGGTCGACGGATCGCAGGTTGGTGAAACCGAGGAT   |
| UpUGacS <sub>W150A</sub>    | CTACTTATGGTACCCGGGAACGTATGGCCGGGGAGC       |
| UpDGacS <sub>W150A</sub>    | CGACAGTTCAGTTCGACTGCGCCGAGTACGCGCTCGTC     |
| DnUGacS <sub>W150A</sub>    | GACGAGCGCGTACTCGGCGCAGTCGAACTGGAAGTGTGC    |
| DnDGacS <sub>W150A</sub>    | CCTGCAGGTCGACGGATCCGCGGGCTGAGCTCGCTC       |
| Deletion mutant             |                                            |
| UpUΔgacS <sub>PD</sub>      | CGGGATCCCTTCGGCAGATAATCGTCGG               |
| UpDΔgacS <sub>PD</sub>      | CGTGGTGC GACCCGCGCTCGATCAACTGGG            |
| DnUΔgacS <sub>PD</sub>      | CGAGCGCGGGTCGCACCACGGGACTCTGCTGC           |
| DnDΔgacS <sub>PD</sub>      | CGGGGCCCATTTCTGGATGGTCGTGAGG               |
| RT-qPCR                     |                                            |
| uvrDUp                      | CACGCCTCGCCCTACAGCA                        |
| uvrDDn                      | GGATCTGGAAGTTCTCGCTCAGC                    |
| exoSUp                      | CTCTACACCGGCATTCACTA                       |
| exoSDn                      | CTTCACTACCTGTT CAGCCT                      |
| vgrG1bUp                    | CCATTTCTACGACTGGCACA                       |
| vgrG1bDo                    | GGGTAGTCGTACAAGCG                          |

Figure S1

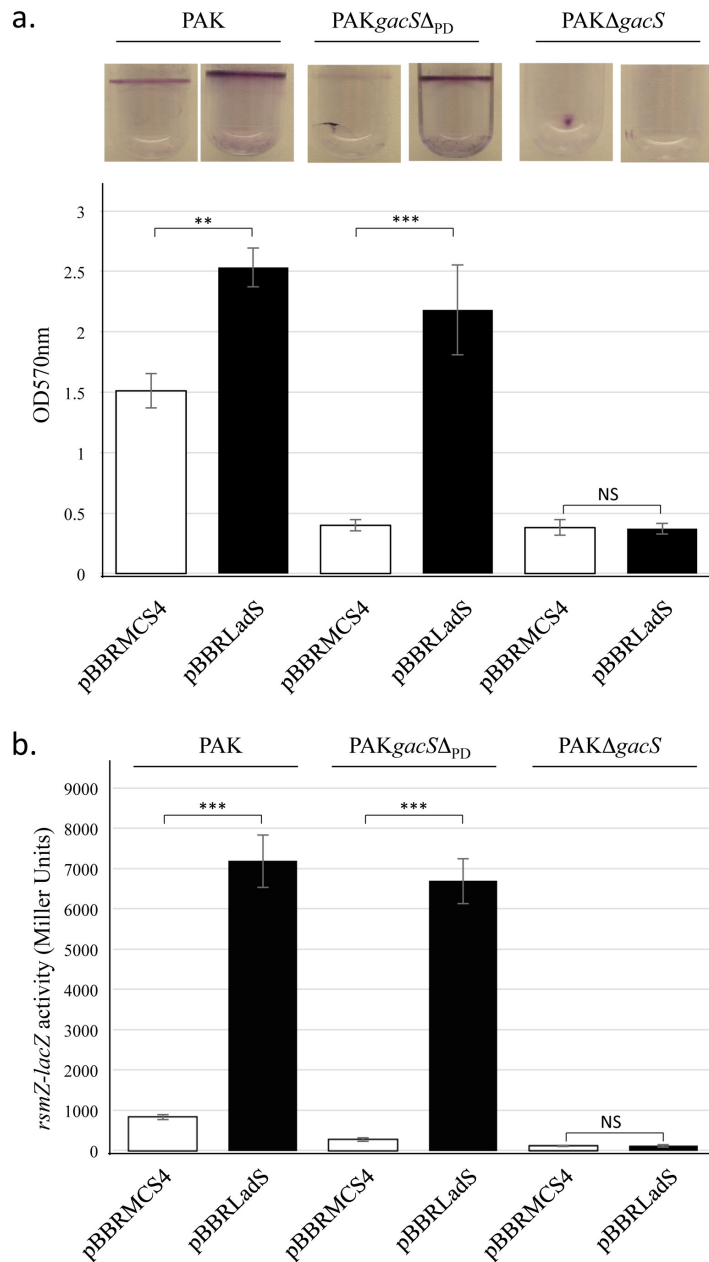

**Figure S1: Effect of overexpression of full length *LadS* on biofilm formation in PAK, PAK $\Delta$ *gacS* and PAK $\Delta$ *gacS $\Delta$ <sub>PD</sub> strains.*** The pBBRLadS plasmid containing the *ladS* HK gene (dark bar) and the corresponding pBBRMCS4 empty cloning vector (light bar) were conjugated in the PAK, PAK $\Delta$ *gacS $\Delta$ <sub>PD</sub> or PAK $\Delta$ *gacS* strains. **(a)** Biofilm production in glass tubes was illustrated (upper panel) and quantified after crystal violet-staining (lower panel). Levels of biofilm production represent mean values and standard deviations obtained from three independent experiments. **(b)** Activities of the *rsmZ-lacZ* transcriptional chromosomal fusions were monitored after 6 hours of growth (OD<sub>600nm</sub>  $\approx$  2) and corresponding  $\beta$ -galactosidase activities are expressed in Miller units and correspond to mean values (with error bars) obtained from three independent experiments. Wilcoxon-Mann-Whitney tests were performed and \*\*, \*\*\* and ns referred to  $p < 0.01$ ,  $p < 0.001$  and non significant difference, respectively.*

Figure S2

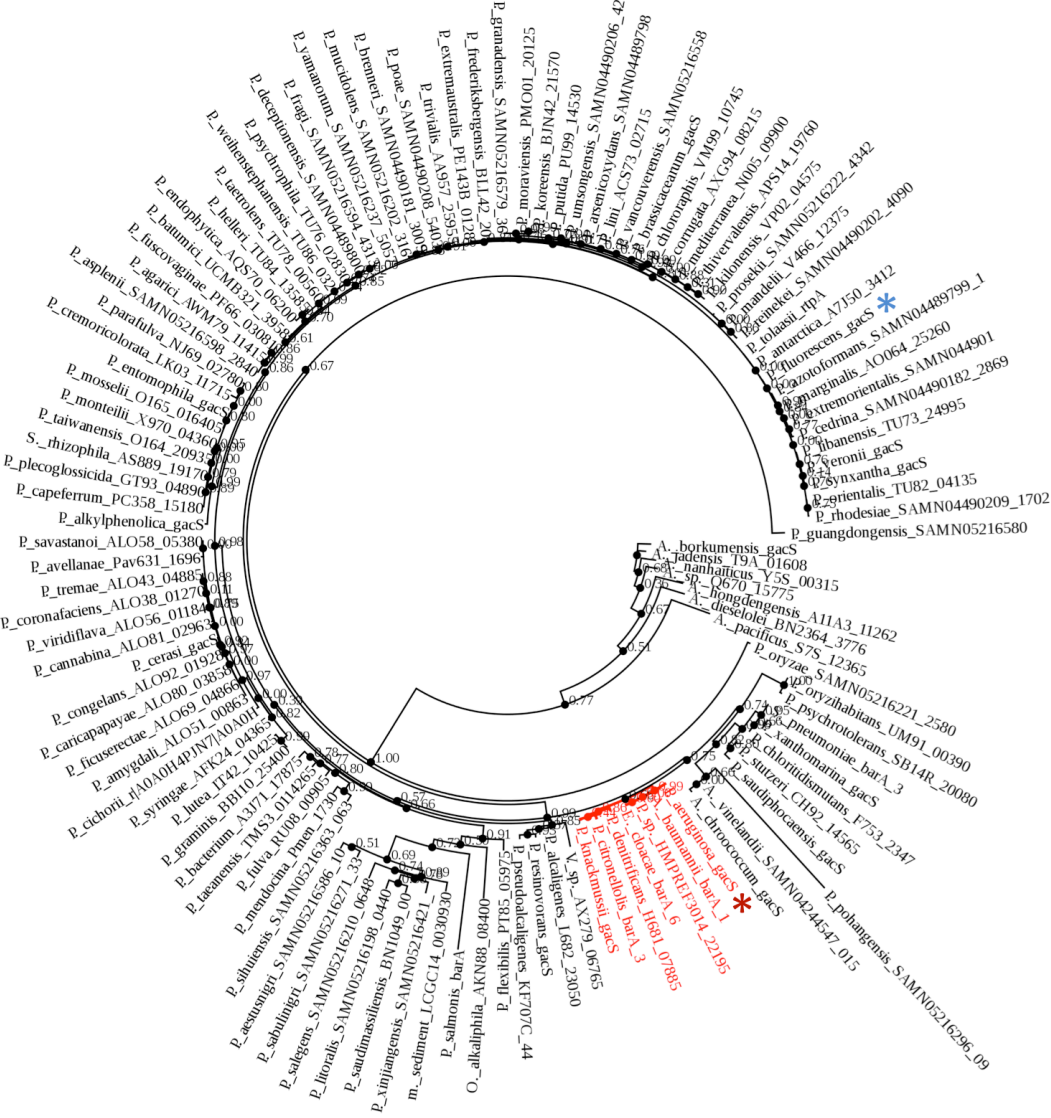

**Figure S2: Phylogenetic tree of the *Pseudomonas* GacS periplasmic domain.** The sequences are named according to the nomenclature adopted for *P. aeruginosa*. We calculated 1000 bootstrap replicates: bootstrap values > 0.5 (I.E 50 %) are indicated on branches. The main branch containing the *P. aeruginosa* GacS protein is highlighted in red, and the red and blue stars denote the position of the GacS periplasmic domain of *P. aeruginosa* and *P. fluorescens*, respectively.

**Figure S3**

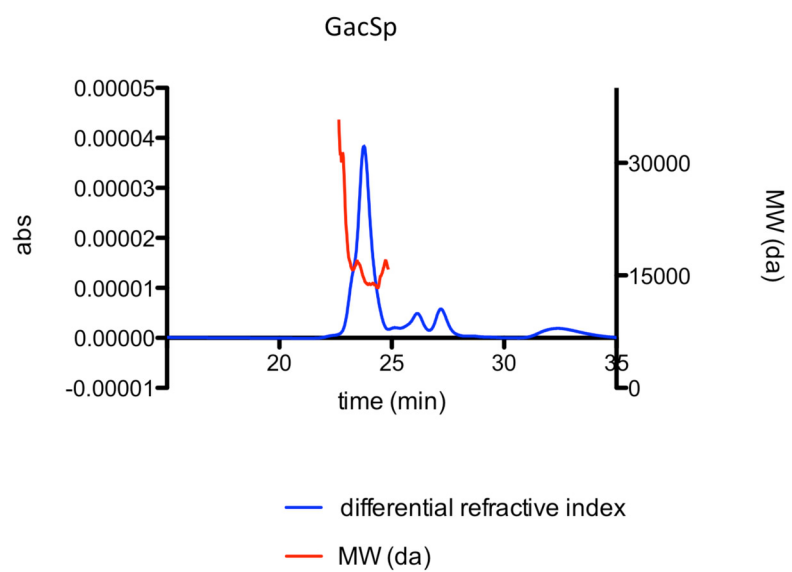

**Figure S3: SEC-MALS elution profile of Gac<sub>SPD</sub>.** The elution profile of Gac<sub>SPD</sub> sample (blue line) and the estimated molecular weight (MW) (red line) reveals a dominant single population with an estimated molecular weight of 15000 Da.

Figure S4

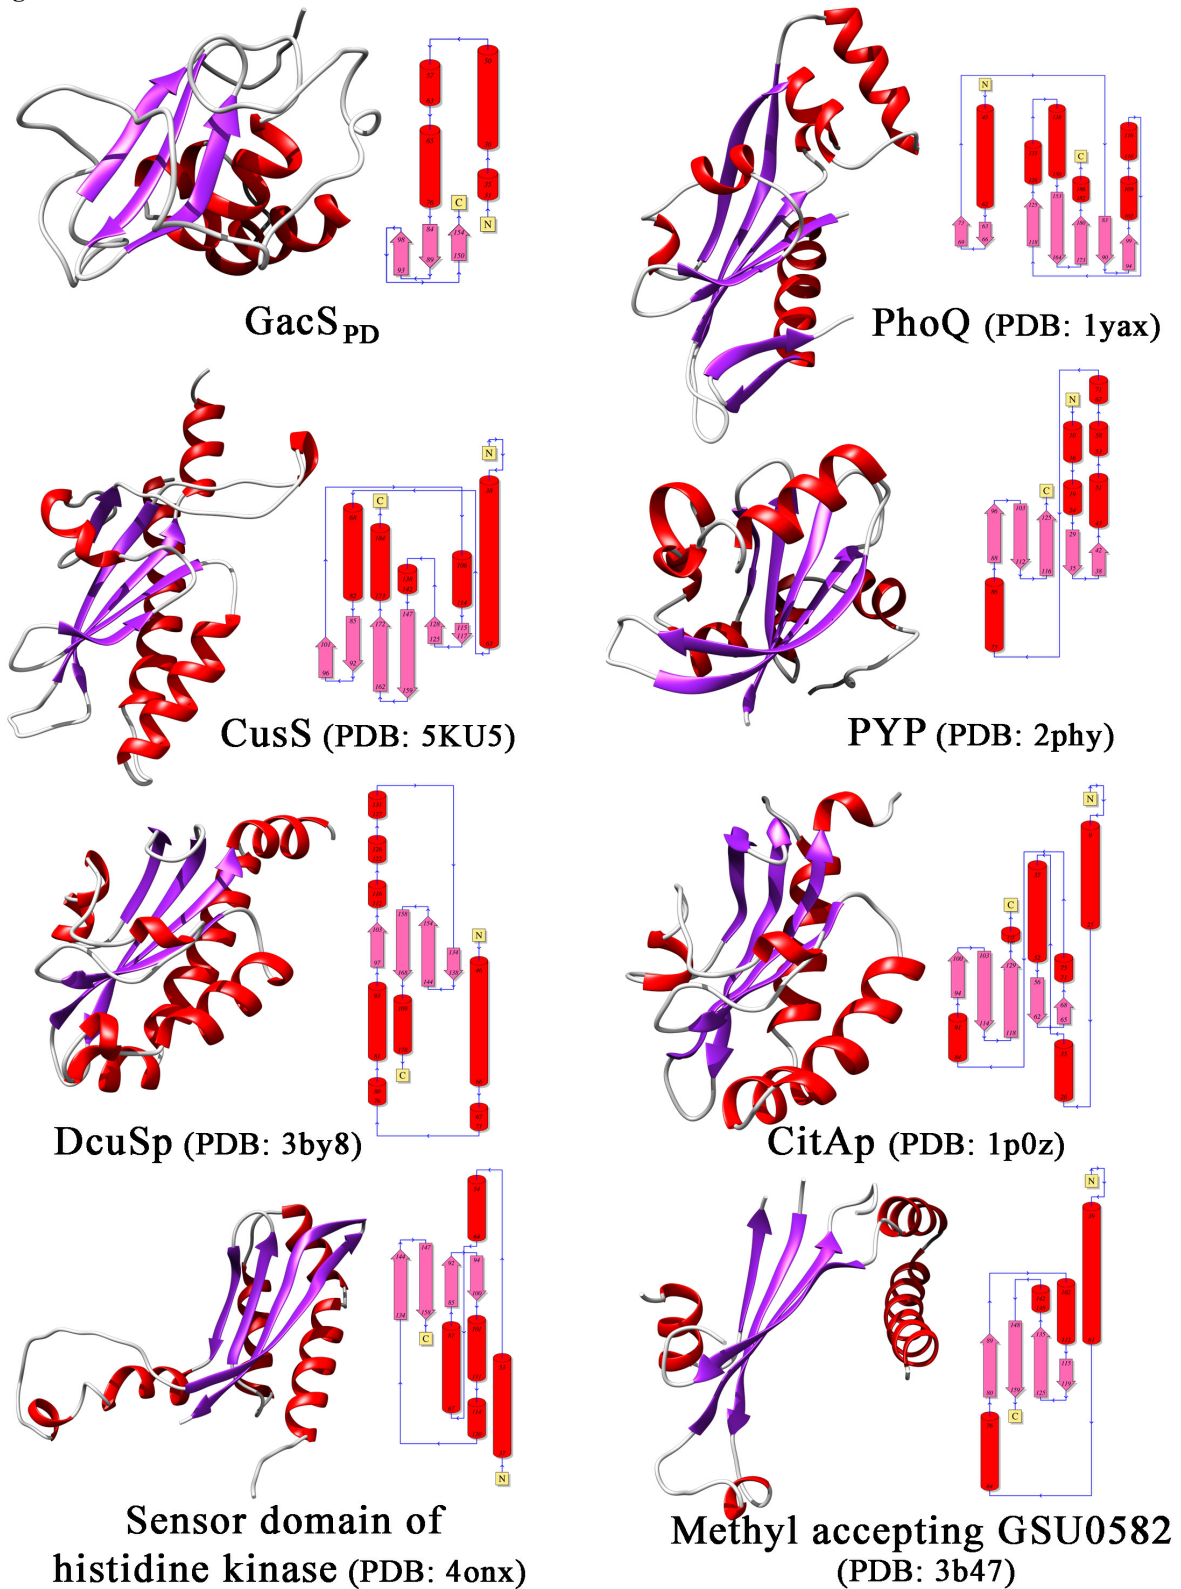

**Figure S4: Structural comparison.** Overall view of GacS<sub>PD</sub> (top left) and 7 structural homologues, viewed in a similar orientation, namely the detection domain of PhoQ from *S. typhimurium*, DcuS from *E. coli*, CitA from *K. pneumoniae*, CusS from *E. coli*, PYP from *H. halophila*, the sensor domain of Histidine Kinase from *C. perfringens* and the methyl-accepting domain GSU0582 from *G. sulfurreducens*.



Figure S5

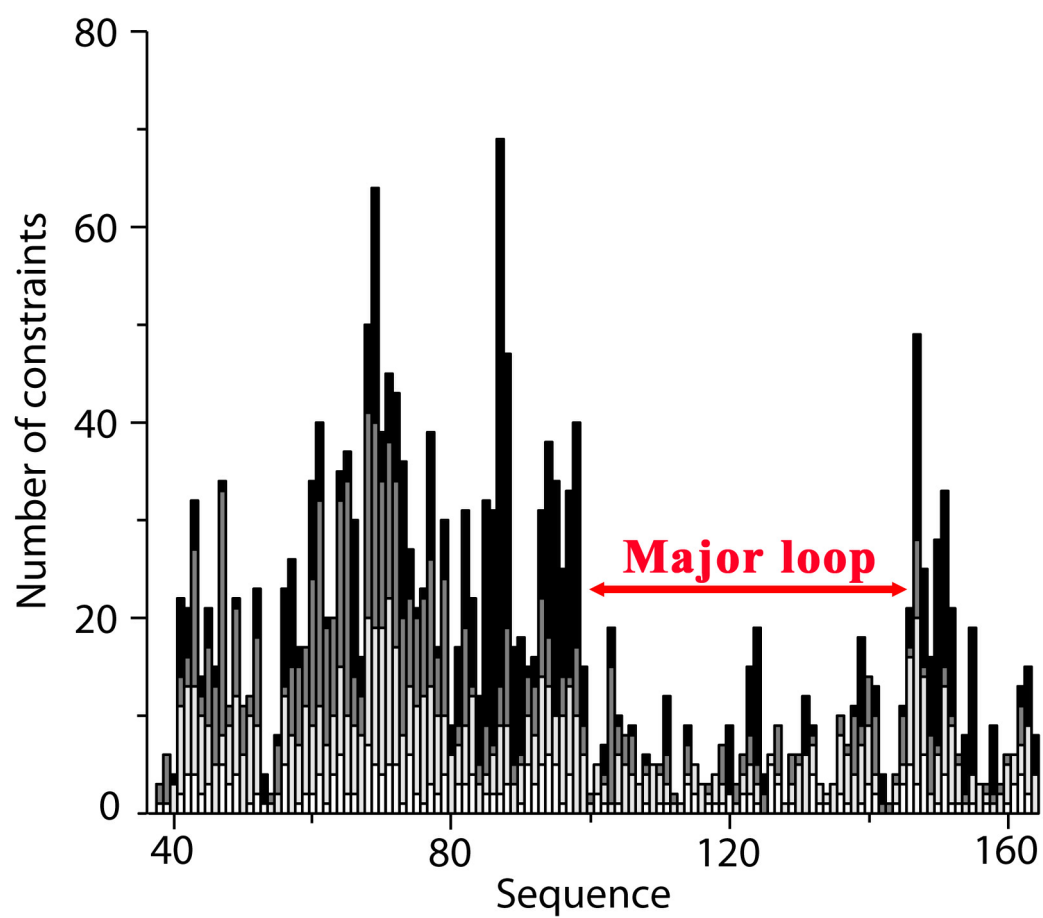

**Figure S5: Distribution of the experimental NMR constraints in GacSPD.** The number of intra-residual (white), short range (light grey), medium-range (dark grey) and long-range (black) restraints is indicated along the amino-acid sequence. The position of the major loop is indicated.

Figure S6

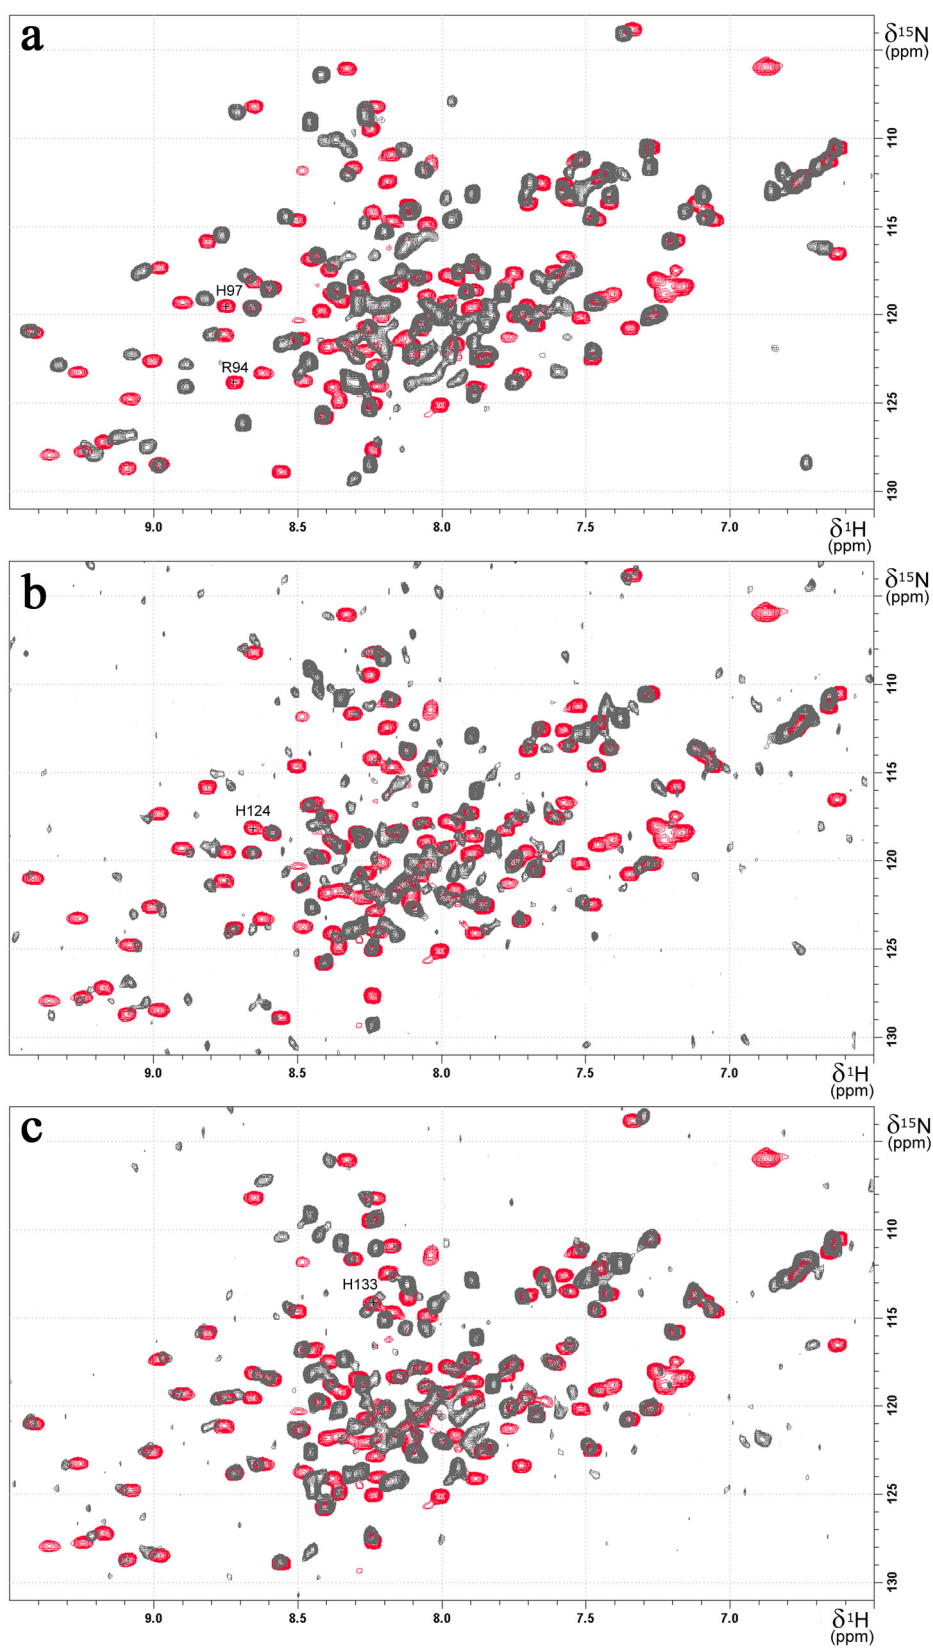

Figure S6: Superimposition of  $^1\text{H}$ ,  $^{15}\text{N}$ -HSQC spectra of GacSPD (in red) and GacSPD R94A/H97A (a), H124A (b), H133A (c) (in grey). The samples were prepared in 50 mM potassium phosphate pH 7, 150mM NaCl. The protein concentration of samples was 150  $\mu\text{M}$ . The spectra were recorded at 298K on a 600MHz NMR spectrometer.

**Table S5: Molecules used for ligand binding assays with GacS<sub>pp</sub>**

|                                                                                                                          |
|--------------------------------------------------------------------------------------------------------------------------|
| Fumarate                                                                                                                 |
| Succinate                                                                                                                |
| Pyruvate                                                                                                                 |
| Tartrate                                                                                                                 |
| Acetate                                                                                                                  |
| Citrate                                                                                                                  |
| Pyrroloquinoline quinone                                                                                                 |
| Malic acid                                                                                                               |
| L/D-Lactate                                                                                                              |
| Glutamate                                                                                                                |
| N-acetyl Glutamate                                                                                                       |
| Glutamine                                                                                                                |
| Arginine                                                                                                                 |
| Homoserine                                                                                                               |
| O-Succinyl-L-homoserine                                                                                                  |
| Putrescine                                                                                                               |
| Spermidine                                                                                                               |
| $\alpha$ -Ketoglutaric acid                                                                                              |
| Malonic acid                                                                                                             |
| Formate                                                                                                                  |
| Glucose                                                                                                                  |
| Gluconate                                                                                                                |
| Glutaraldehyde                                                                                                           |
| Reduced/Oxydized<br>Glutathion                                                                                           |
| Thiamine                                                                                                                 |
| Guanosine diphosphate<br>(GDP)                                                                                           |
| Leucine                                                                                                                  |
| $\gamma$ -aminobutyric acid<br>(GABA)                                                                                    |
| Fructose                                                                                                                 |
| Ions: Ni <sup>2+</sup> , Mg <sup>2+</sup> , Fe <sup>2+</sup> ,<br>Zn <sup>2+</sup> , Mn <sup>2+</sup> , Ca <sup>2+</sup> |
